# Supplementary material for: Essential role for SUN5 in anchoring sperm head to the tail
Source: eLife. 2017 Sep 25;6:e28199. doi: 10.7554/eLife.28199 (PMC5634783; doi:10.7554/eLife.28199)
Supplement: Figure 1—source data 1. [file elife-28199-fig1-data1.xlsx]

## Sheet: Fig 1 C 
	Genotype	Individual	Pregnancy Rate
			Average	Mean	SEM	p value (VS sun5 -/-)	p value (VS sun5 +/-)
	WT	mouse 1	85.7143	92.46	3.39	1.24049e-06	0.2955
		mouse 2	100
		mouse 3	100
		mouse 4	85.7143
		mouse 5	100
		mouse 6	83.3333
	Sun5+/-	mouse 1	100	88.33	3.727	1.35726e-07	NA
		mouse 2	83.3333
		mouse 3	100
		mouse 4	83.3333
		mouse 5	80
		mouse 6	83.3333
	Sun5-/-	mouse 1	0	0	0	NA	1.35726e-07
		mouse 2	0
		mouse 3	0
		mouse 4	0
		mouse 5	0
		mouse 6	0
	Average means the average pregnancy rate of the same mouse during the fertility test.

## Sheet: Fig 1 D
	Genotype	Individual	Litter size
			Average	Mean	SEM	p value (VS sun5 -/-)	p value (VS sun5 +/-)
	WT	mouse 1	11	10.65	0.2163	9.85413e-27	0.39
		mouse 2	11
		mouse 3	10.8
		mouse 4	10.6667
		mouse 5	10.8333
		mouse 6	9.6
	Sun5+/-	mouse 1	9.71429	10.27	0.3802	5.47597e-25	NA
		mouse 2	12
		mouse 3	10.2
		mouse 4	9.8
		mouse 5	10.5
		mouse 6	9.4
	Sun5-/-	mouse 1	0	0	0	NA	5.47597e-25
		mouse 2	0
		mouse 3	0
		mouse 4	0
		mouse 5	0
		mouse 6	0
	Average means the average litter size of the same mouse during the fertility test.

## Sheet: Fig1G
	Genotype	Individual	sperm concentration
			Average	Mean	SEM	p value (VS sun5 -/-)	p value (VS sun5 +/-)
	WT	mouse 1	37.44	33.92	1.71	0.65223	0.167531
		mouse 2	29.96
		mouse 3	38.04
		mouse 4	30.25																		32.04	35.36	33.45
		mouse 5	33.89
	Sun5+/-	mouse 1	33.56	31.29	0.939	0.405819	NA
		mouse 2	31.66
		mouse 3	30.31
		mouse 4	28.22
		mouse 5	32.69
	Sun5-/-	mouse 1	37.05	33.03	1.672	NA	0.405819
		mouse 2	27.27
		mouse 3	32.04
		mouse 4	35.36
		mouse 5	33.45
	Average means the average value of three counts of the same mouse in the experiment.

## Sheet: Fig 1 H
	Genotype	Individual	Motile sperms
			Measurement	Mean	SEM	p value (VS sun5 -/-)	p value (VS sun5 +/-)
	WT	mouse 1 (%)	90	90.2	0.6633	0.000132707	0.92459
		mouse 2 (%)	88
		mouse 3 (%)	90
		mouse 4 (%)	91
		mouse 5 (%)	92
	Sun5+/-	mouse 1 (%)	93	90.4	0.143	0.000552451	NA
		mouse 2 (%)	92
		mouse 3 (%)	92
		mouse 4 (%)	90
		mouse 5 (%)	85
	Sun5-/-	mouse 1 (%)	60	60.2	1.985	NA	0.00064341
		mouse 2 (%)	63
		mouse 3 (%)	57
		mouse 4 (%)	55
		mouse 5 (%)	66

## Sheet: Fig 1J
		Spermatozoa components	Replicates (n=5)					Mean	SEM	p value (VS sun5 -/-)
	WT	Head only (%)	0.5	4.9	4.9	3.2	5.4	3.78	0.9008	0.322681
		round headed (%)	2.3	5.3	2.6	7.6	4.1	4.38	0.9692	5.82534e-07
		Intact sperm (%)	97.2	89.8	95.5	89.2	90.5	92.44	1.632	1.01223e-06
	Sun5+/-	Head only (%)	5.4	2.1	4.6	3.3	2.6	3.6	0.6156	0.072845
		round headed (%)	10.1	8.7	8.5	9.3	6.2	8.56	0.06524	2.72597e-07
		Intact sperm (%)	84.5	89.2	86.9	87.4	91.2	87.84	1.126	7.62976e-08
	Sun5-/-	Head only (%)	5.9	4.4	5.8	7.9	3.2	5.44	0.7903	NA
		round headed (%)	94.1	95.1	93.9	90.9	95.3	93.86	0.7884	NA
		Intact sperm (%)	0	0.5	0.3	1.2	1.5	0.7	0.2811	NA
